# Supplementary material for: Rate and Risk Factors of Acute Myocardial Infarction after Debut of Chronic Kidney Disease—Results from the KidDiCo
Source: MDPI journal article supplement (doi:10.3390/jcdd9110387), 2022-11-09
Supplement: s1 [file s1]

**Table S1.** Characteristics of patients with CKD G3-5 with and without AMI during the 5-year follow-up period.

|                                                                         |               | CKD G3-5<br>patients<br>without an<br>AMI during<br>the 5-year<br>follow-up<br>period | CKD G3-5<br>patients with<br>an AMI<br>during the 5-<br>year follow-<br>up period | <i>p</i> -Value * |
|-------------------------------------------------------------------------|---------------|---------------------------------------------------------------------------------------|-----------------------------------------------------------------------------------|-------------------|
|                                                                         |               | N=65,270                                                                              | N=1,216                                                                           |                   |
| Sex                                                                     | male          | 25,666 (39.3%)                                                                        | 639 (52.5%)                                                                       | <0.001            |
|                                                                         | female        | 39,604 (60.7%)                                                                        | 577 (47.5%)                                                                       |                   |
| Age (median)                                                            |               | 76 (69-83)                                                                            | 76 (69-81)                                                                        | 0.11              |
| CKD stage<br>according to GFR                                           | 3a            | 43,771 (67.1%)                                                                        | 849 (69.8%)                                                                       | 0.22              |
|                                                                         | 3b            | 15,503 (23.8%)                                                                        | 262 (21.5%)                                                                       |                   |
|                                                                         | 4             | 4,286 ( 6.6%)                                                                         | 73 ( 6.0%)                                                                        |                   |
|                                                                         | 5             | 1,710 ( 2.6%)                                                                         | 32 ( 2.6%)                                                                        |                   |
|                                                                         |               | 47.0407<br>(11.26436)                                                                 | 47.56311<br>(10.6039)                                                             |                   |
| CKD stage<br>according to<br>albuminuria                                | A1            | 4,807 ( 7.4%)                                                                         | 135 (11.1%)                                                                       | <0.001            |
|                                                                         | A2            | 1,061 ( 1.6%)                                                                         | 29 ( 2.4%)                                                                        |                   |
|                                                                         | A3            | 161 ( 0.2%)                                                                           | 7 ( 0.6%)                                                                         |                   |
|                                                                         | missing       | 59,241 (90.8%)                                                                        | 1,045 (85.9%)                                                                     |                   |
|                                                                         |               |                                                                                       |                                                                                   |                   |
| Diabetes                                                                | no            | 54,119 (82.9%)                                                                        | 961 (79.0%)                                                                       | <0.001            |
|                                                                         | yes           | 11,151 (17.1%)                                                                        | 255 (21.0%)                                                                       |                   |
| Hypertension                                                            | no            | 12,576 (19.3%)                                                                        | 165 (13.6%)                                                                       | <0.001            |
|                                                                         | yes           | 52,694 (80.7%)                                                                        | 1,051 (86.4%)                                                                     |                   |
| Cardiovascular<br>disease (excluding<br>acute myocardial<br>infarction) | no            | 49,251 (75.5%)                                                                        | 885 (72.8%)                                                                       | 0.032             |
|                                                                         | yes           | 16,019 (24.5%)                                                                        | 331 (27.2%)                                                                       |                   |
| Acute myocardial<br>infarction prior to<br>CKD                          | no            | 60,988 (93.4%)                                                                        | 1,008 (82.9%)                                                                     | <0.001            |
|                                                                         | yes           | 4,282 ( 6.6%)                                                                         | 208 (17.1%)                                                                       |                   |
| Educational level                                                       | short         | 49,657 (76.1%)                                                                        | 1,001 (82.3%)                                                                     | <0.001            |
|                                                                         | medium        | 6,617 (10.1%)                                                                         | 100 ( 8.2%)                                                                       |                   |
|                                                                         | long          | 389 ( 0.6%)                                                                           | 8 ( 0.7%)                                                                         |                   |
|                                                                         | missing       | 8,607 (13.2%)                                                                         | 107 ( 8.8%)                                                                       |                   |
| Occupational<br>status                                                  | active        | 4,739 ( 7.3%)                                                                         | 73 ( 6.0%)                                                                        | 0.071             |
|                                                                         | not active    | 59,867 (91.7%)                                                                        | 1,136 (93.4%)                                                                     |                   |
|                                                                         | other/missing | 664 ( 1.0%)                                                                           | 7 ( 0.6%)                                                                         |                   |

\* values below 0.05 were considered significant.
